# Supplementary material
Source: ML conference proceedings conference paper supplement (https://openaccess.thecvf.com/content/ICCV2021/html/Zhang_Learning_RAW-to-sRGB_Mappings_ICCV_2021_paper.html)
Supplement: Supplementary file 1 [file Zhang_Learning_RAW-to-sRGB_Mappings_ICCV_2021_supplemental.pdf]

# Learning RAW-to-sRGB Mappings with Inaccurately Aligned Supervision (Supplementary Material)

Zhilu Zhang<sup>1</sup>, Haolin Wang<sup>1</sup>, Ming Liu<sup>1</sup>, Ruohao Wang<sup>1</sup>, Jiawei Zhang<sup>2</sup>, Wangmeng Zuo<sup>1,3</sup> (✉)

<sup>1</sup>Harbin Institute of Technology, <sup>2</sup>SenseTime Research, <sup>3</sup>Pazhou Lab, Guangzhou

{cszllzhang, Why\_cs, csmlu, rhwangHIT}@outlook.com {zhjw1988}@gmail.com wzmzuo@hit.edu.cn

## A. Content

The content of this supplementary material involves:

- Network structure of GCM, LiteISPNet and the discriminator of LiteISPGAN in Sec. B.
- Visual results of alignment in Sec. C.
- Qualitative results of ablation study in Sec. D
- Implementation details on SR-RAW dataset in Sec. E.
- Quantitative results for re-splitting the train/test set on ZRR dataset in Sec. F.
- Additional visual comparison results on SR-RAW and ZRR dataset in Sec. G.

## B. Network Structure

Global color mapping (GCM) module involves two components: spatially preserving network (SPN) and GuideNet. SPN stacks  $1 \times 1$  convolutional layers to guarantee spatial independence of the mapping and GuideNet generates a conditional guidance vector from the target sRGB to modulate SPN features. The detailed structure of GCM are shown in Table A.

The structure configuration of LiteISPNet are shown in Table B. LiteISPNet is a U-Net [7] based multi-level wavelet ISP network. In each residual group, we only apply 4 residual channel attention blocks (RCABs).

The discriminator structure of LiteISPGAN are shown in Table C. We apply  $54 \times 54$  PatchGAN [11], which distinguishes whether the image patch is real or fake.

## C. Visual Results of Alignment

We show the demosaicked raw image ( $\hat{x}$ ), GCM output ( $\tilde{y}$ ), LiteISPNet output ( $\hat{y}$ ), warped target sRGB image ( $y^w$ ) and the original target sRGB image ( $y$ ) in Fig. A.

It can be seen that the color of  $\tilde{y}$  is consistent with  $y$ . Although GCM model cannot perform local operations (*e.g.*, denoising), benefiting from PWC-Net [8], we can still align  $y$  with  $\tilde{y}$  robustly. Under the supervision of well aligned training data, LiteISPNet output has almost no pixel shift.

In short, our method achieves the joint of image alignment and RAW-to-sRGB mapping.

## D. Qualitative Results on Ablation Study

We show more qualitative results of different alignment strategies in Fig. B.

Due to the limitation of space in the submitted manuscript, we only showed the outputs of GCM model in Sec. 5.2. Here, by visualizing the illuminance ratio between the output of GCM and ground-truth (GT), we show the influence of each component and the dark corner phenomenon more clearly in Fig. C.

## E. Implementation Details on SR-RAW Dataset

In each image pair of the SR-RAW dataset, the short focal-length raw image is used as input, while the long focal-length sRGB image is adopted as the ground-truth. In order to align high-resolution (HR) sRGB images with low-resolution (LR) raw images, we adopt downsampled HR sRGB image  $y_{\downarrow}$  to generate the conditional guidance vector in the GCM model. Then the optical flow between the GCM output  $\tilde{y}$  and  $y_{\downarrow}$  is estimated. Note that the size of optical flow is a quarter of the HR sRGB image. Thus, we upsample the optical flow to get the warped HR sRGB image. Finally, the warped HR sRGB image is utilized to supervise the learning of the backbone (SRResNet [5]).

Following [10], we use 400 scenes of images for training, 50 for validation, and the rest 50 for testing, and report the performance on 35/150 mm pairs in Table 2 of the main text. For a comprehensive comparison, we further show the performance on all 24/100, 35/150 and 50/240 test pairs in Table D. It can be seen that our method can still achieve better quantitative performance against all competing methods.

Table A: Structure configuration of GCM model. GCM involves two components: SPN (left column) and GuideNet (right column). Except for the stride of the first convolutional layer in GuideNet is 2, the stride of other convolutional layers is 1.

| Spatially Preserving Network (SPN) |                  |              |                     | GuideNet               |                  |              |                     |
|------------------------------------|------------------|--------------|---------------------|------------------------|------------------|--------------|---------------------|
| Layer                              | Output size      | Kernel size  | Filter              | Layer                  | Output size      | Kernel size  | Filter              |
| Conv, ReLU                         | $448 \times 448$ | $1 \times 1$ | $5 \rightarrow 64$  | Conv                   | $222 \times 222$ | $7 \times 7$ | $8 \rightarrow 32$  |
| [Conv, ReLU] $\times 3$            | $448 \times 448$ | $1 \times 1$ | $64 \rightarrow 64$ | Conv, ReLU, Conv       | $222 \times 222$ | $3 \times 3$ | $32 \rightarrow 32$ |
| Conv                               | $448 \times 448$ | $1 \times 1$ | $64 \rightarrow 3$  | Global Average Pooling | $1 \times 1$     | -            | -                   |
|                                    |                  |              |                     | Conv                   | $1 \times 1$     | $1 \times 1$ | $32 \rightarrow 64$ |

Table B: Structure configuration of LiteISPNet. DWT and IWT denote discrete wavelet transform and inverse wavelet transform, respectively. RG denotes the residual group containing 4 residual channel attention blocks (RCABs).

| LiteISPNet   |                  |                       |
|--------------|------------------|-----------------------|
| Layer        | Output size      | Filter                |
| Conv         | $224 \times 224$ | $4 \rightarrow 64$    |
| RG           | $224 \times 224$ | $64 \rightarrow 64$   |
| DWT          | $112 \times 112$ | $64 \rightarrow 256$  |
| Conv         | $112 \times 112$ | $256 \rightarrow 64$  |
| RG           | $112 \times 112$ | $64 \rightarrow 64$   |
| DWT          | $56 \times 56$   | $64 \rightarrow 256$  |
| Conv         | $56 \times 56$   | $256 \rightarrow 128$ |
| RG           | $56 \times 56$   | $128 \rightarrow 128$ |
| DWT          | $28 \times 28$   | $128 \rightarrow 512$ |
| Conv         | $28 \times 28$   | $512 \rightarrow 128$ |
| RG           | $28 \times 28$   | $128 \rightarrow 128$ |
| RG           | $28 \times 28$   | $128 \rightarrow 128$ |
| Conv         | $28 \times 28$   | $128 \rightarrow 512$ |
| IWT          | $56 \times 56$   | $512 \rightarrow 128$ |
| RG           | $56 \times 56$   | $128 \rightarrow 128$ |
| Conv         | $56 \times 56$   | $128 \rightarrow 256$ |
| IWT          | $112 \times 112$ | $256 \rightarrow 64$  |
| RG           | $112 \times 112$ | $64 \rightarrow 64$   |
| Conv         | $112 \times 112$ | $64 \rightarrow 256$  |
| IWT          | $224 \times 224$ | $256 \rightarrow 64$  |
| RG           | $224 \times 224$ | $64 \rightarrow 64$   |
| Conv         | $224 \times 224$ | $64 \rightarrow 64$   |
| Conv         | $224 \times 224$ | $64 \rightarrow 256$  |
| PixelShuffle | $448 \times 448$ | $256 \rightarrow 64$  |
| Conv         | $448 \times 448$ | $64 \rightarrow 3$    |

## F. Quantitative results for re-splitting the train/test set on ZRR dataset

For the ZRR dataset, we follow the official division to train our LiteISPNet with 46,839 pairs, and report the quantitative results on the remaining 1,204 pairs in the main text. Here we conducted an experiment by re-splitting the dataset at approximately 9 : 1, *i.e.*, 43,200 pairs for training and the rest 4,843 pairs for testing. Table E shows the quantitative results, and it can be seen that our LiteISPNet also exceeds the competing methods.

Table C: Structure configuration of the discriminator. The kernel size of all convolutional layers is  $4 \times 4$ . The stride of the first three convolutional layers is 2, while the stride of the last two convolutional layers is 1.

| Discriminator              |                  |                       |
|----------------------------|------------------|-----------------------|
| Layer                      | Output size      | Filter                |
| Conv, LeakyReLU            | $224 \times 224$ | $3 \rightarrow 64$    |
| Conv, BatchNorm, LeakyReLU | $112 \times 224$ | $64 \rightarrow 128$  |
| Conv, BatchNorm, LeakyReLU | $56 \times 56$   | $128 \rightarrow 256$ |
| Conv, BatchNorm, LeakyReLU | $55 \times 55$   | $256 \rightarrow 512$ |
| Conv, BatchNorm, LeakyReLU | $54 \times 54$   | $512 \rightarrow 1$   |

Table D: Average results on all 24/100, 35/150 and 50/240 test pairs of SR-RAW dataset. Methods taking LR sRGB image as input are marked with  $\dagger$ . The metrics are computed by *Align GT with result*.

| Method                   | PSNR $\uparrow$ / SSIM $\uparrow$ / LPIPS $\downarrow$ |
|--------------------------|--------------------------------------------------------|
| SRGAN $^\dagger$ [5]     | 21.72 / 0.6917 / 0.394                                 |
| ESRGAN $^\dagger$ [9]    | 21.85 / 0.6904 / 0.393                                 |
| SPSR $^\dagger$ [6]      | 21.75 / 0.6692 / 0.427                                 |
| RealSR $^\dagger$ [4]    | 21.89 / 0.6918 / 0.388                                 |
| Zhang <i>et al.</i> [10] | 21.97 / 0.7360 / 0.357                                 |
| Ours                     | 22.50 / <b>0.7369</b> / 0.329                          |
| Ours (GAN)               | <b>22.56</b> / 0.7341 / <b>0.323</b>                   |

Table E: Quantitative results for re-splitting the train/test set of ZRR dataset. The metrics are computed by *Align GT with result*.

| Method                 | PSNR $\uparrow$ / SSIM $\uparrow$ / LPIPS $\downarrow$ |
|------------------------|--------------------------------------------------------|
| PyNet [3]              | 22.67 / 0.8535 / 0.149                                 |
| AWNet (raw) [1]        | 22.83 / 0.8513 / 0.160                                 |
| AWNet (demosacked) [1] | 22.68 / 0.8447 / 0.173                                 |
| MWISPNet [2]           | 23.00 / 0.8530 / 0.166                                 |
| Ours (LiteISPNet)      | <b>23.31</b> / <b>0.8747</b> / <b>0.131</b>            |

## G. Additional visual comparison results on SR-RAW and ZRR dataset

In Fig. D~F, we show more qualitative comparison results generated by SRGAN [5], ESRGAN [9], SPSR [6], RealSR [4], Zhang *et al.* [10] and our models on the SR-RAW dataset.

In Fig. G~I, we show more qualitative results generated by PyNet [3], AWWNet [1], MWISPNet [2] and our models on the ZRR dataset.

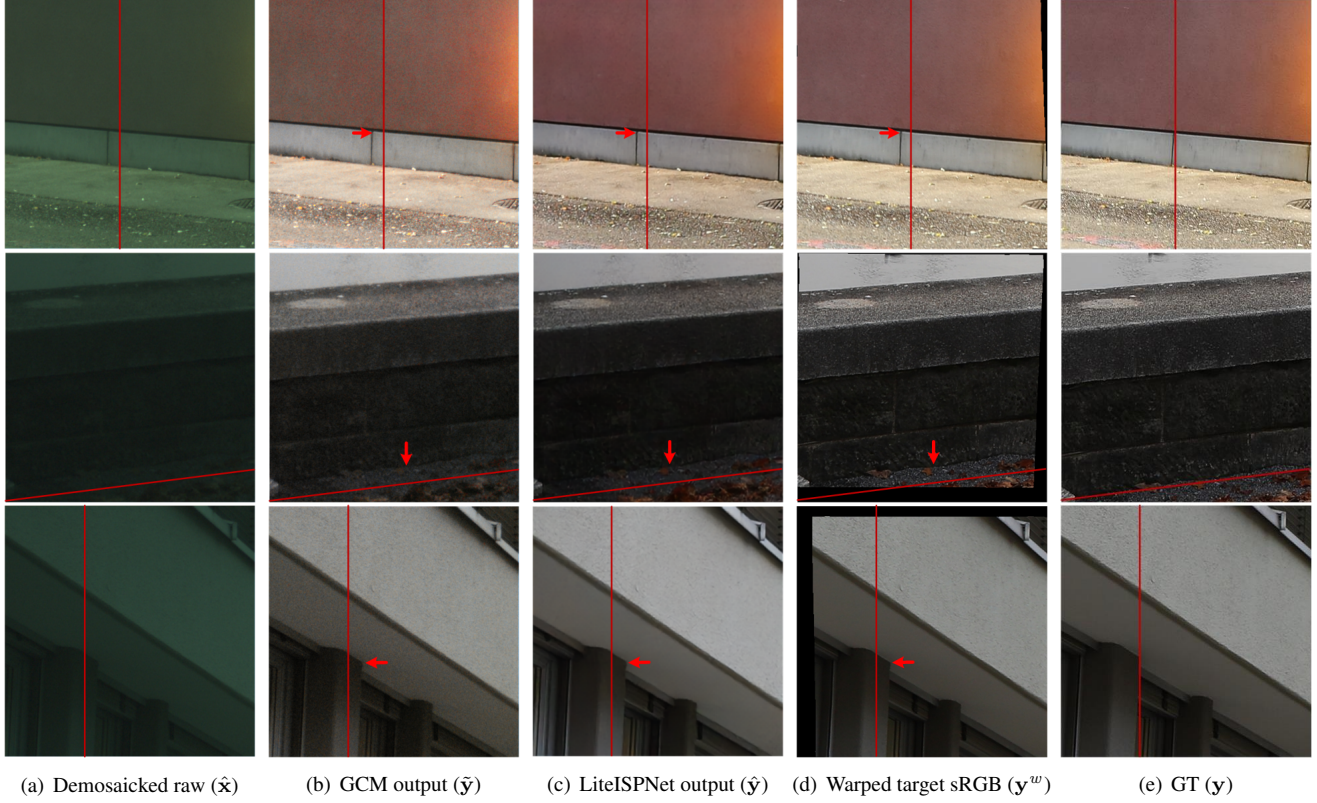

Figure A: Alignment visual results obtained by our joint learning framework. With the reference line, it can be observed our method obtains the well aligned data pairs while the demosaicked raw is not aligned with GT.

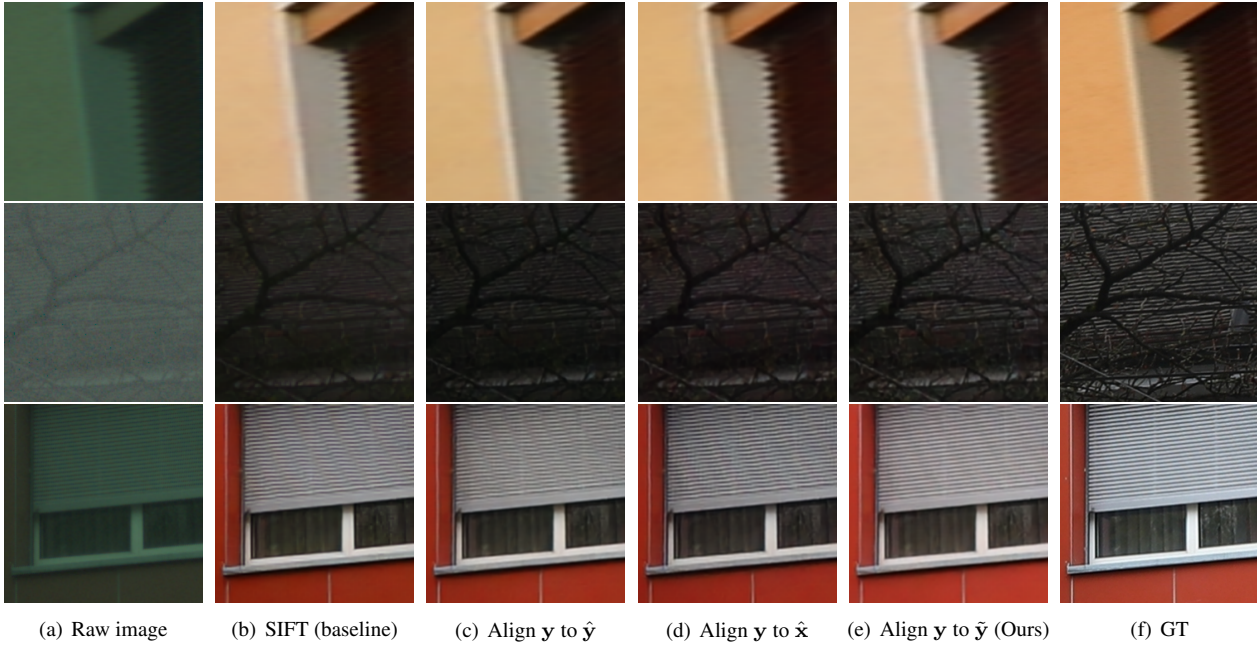

Figure B: Visual results of LiteISPNet output  $\hat{y}$ . (b)~(e) denote different alignment strategies. Our method (e) performs favorably against other alignment strategies.



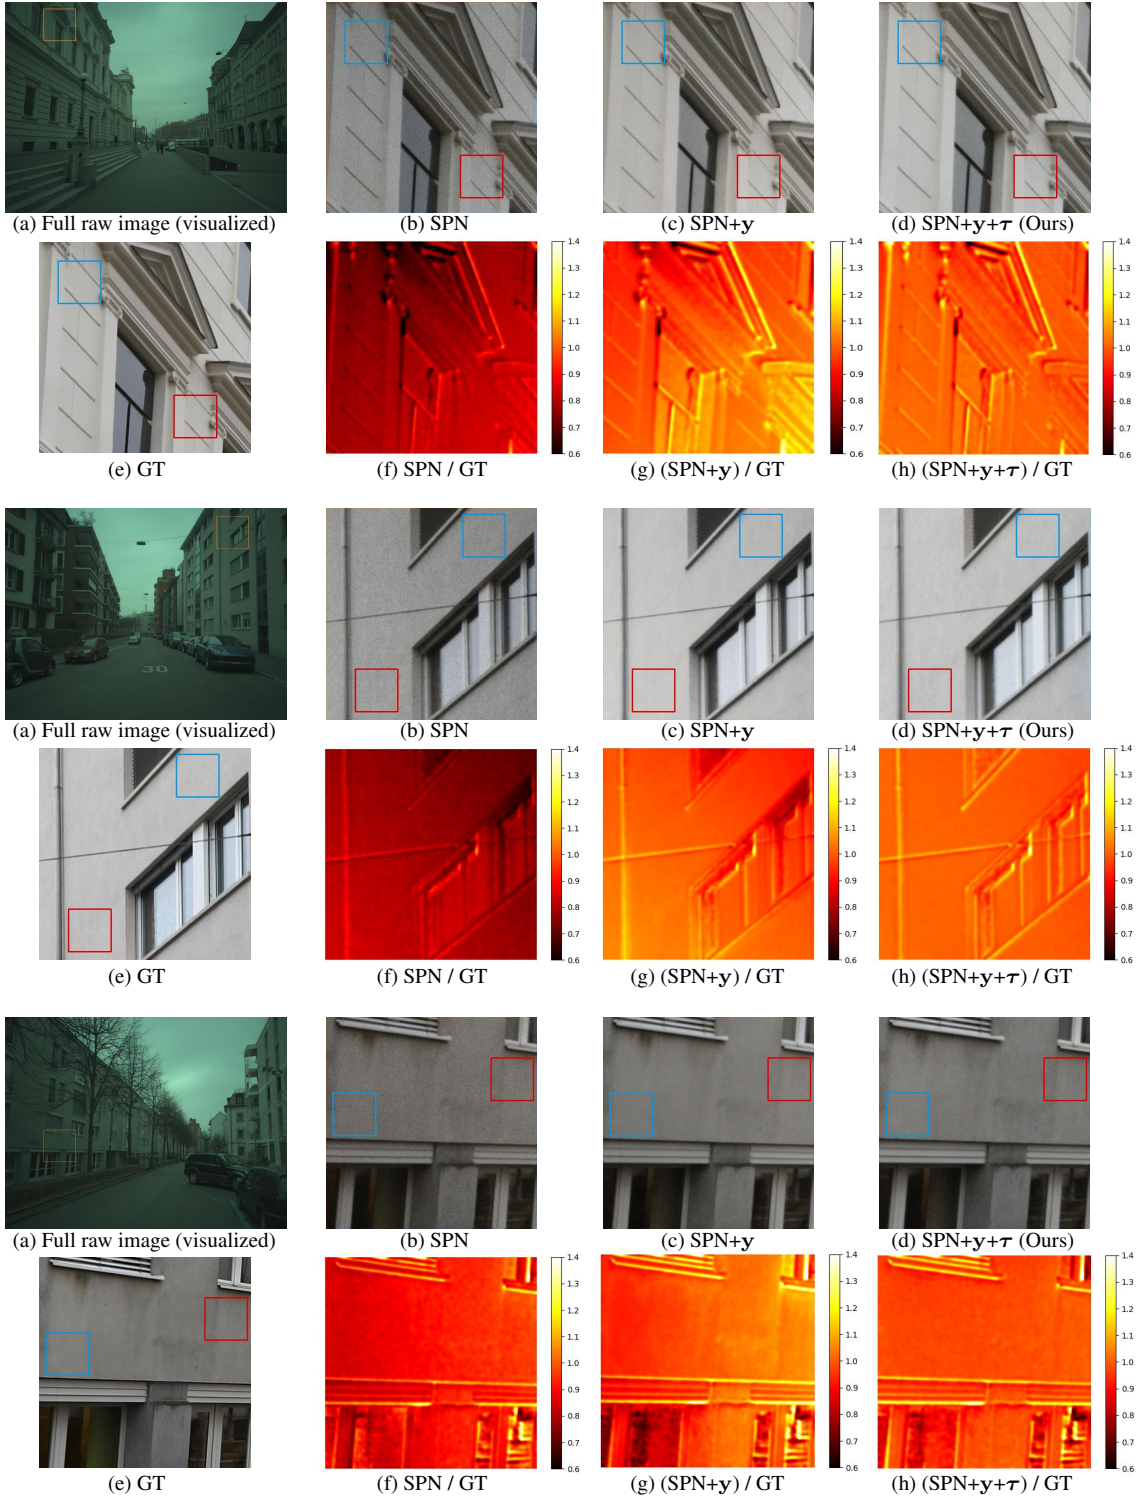

Figure C: Visual results of GCM output  $\hat{y}$ . (b)~(d) denote the results using different GCM components. (f)~(h) denote the illumination ratio between (b)~(d) and GT, respectively. With the guidance of  $y$ , the color of GCM output  $\hat{y}$  in (c) and (d) is closer to the target sRGB image. Dark corner can be observed in (b) and (c). In (b) and (c), the patch in the blue box is darker than the patch in the red box. But in (d) and (e), the patch in different boxes has similar illumination. The phenomenon can be seen more clearly in (f)~(h).



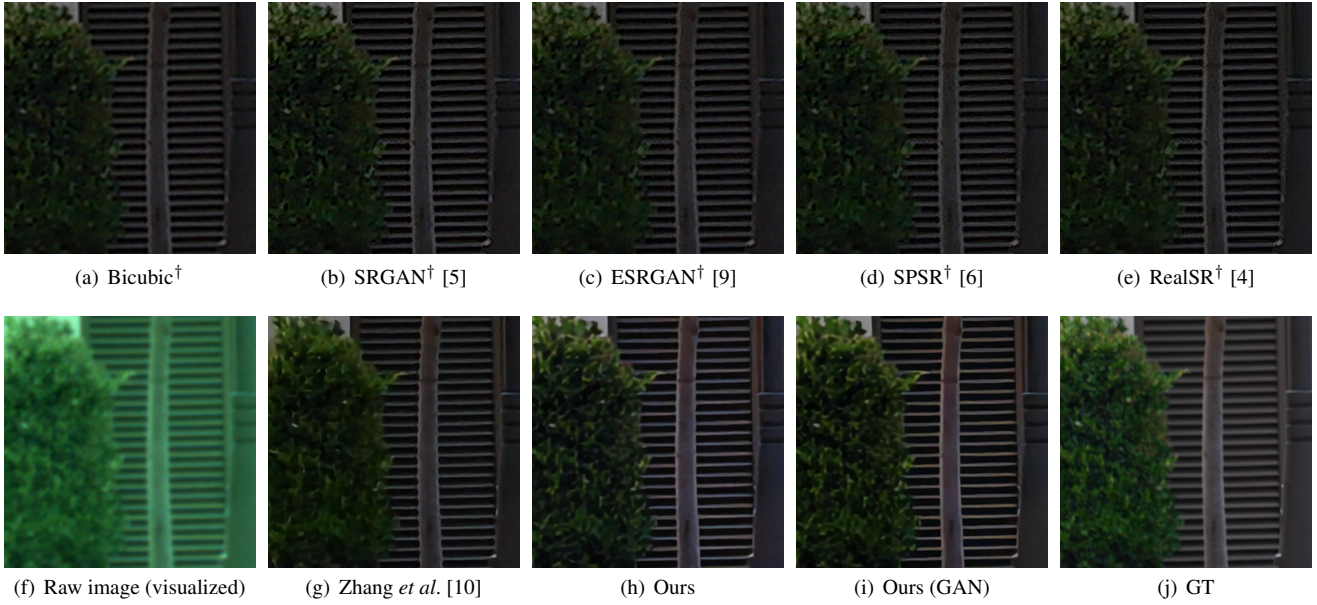

Figure D: Visual comparison on SR-RAW dataset. <sup>†</sup> means that the result is obtained given LR sRGB image as input. Our results have more textures on the leaves.

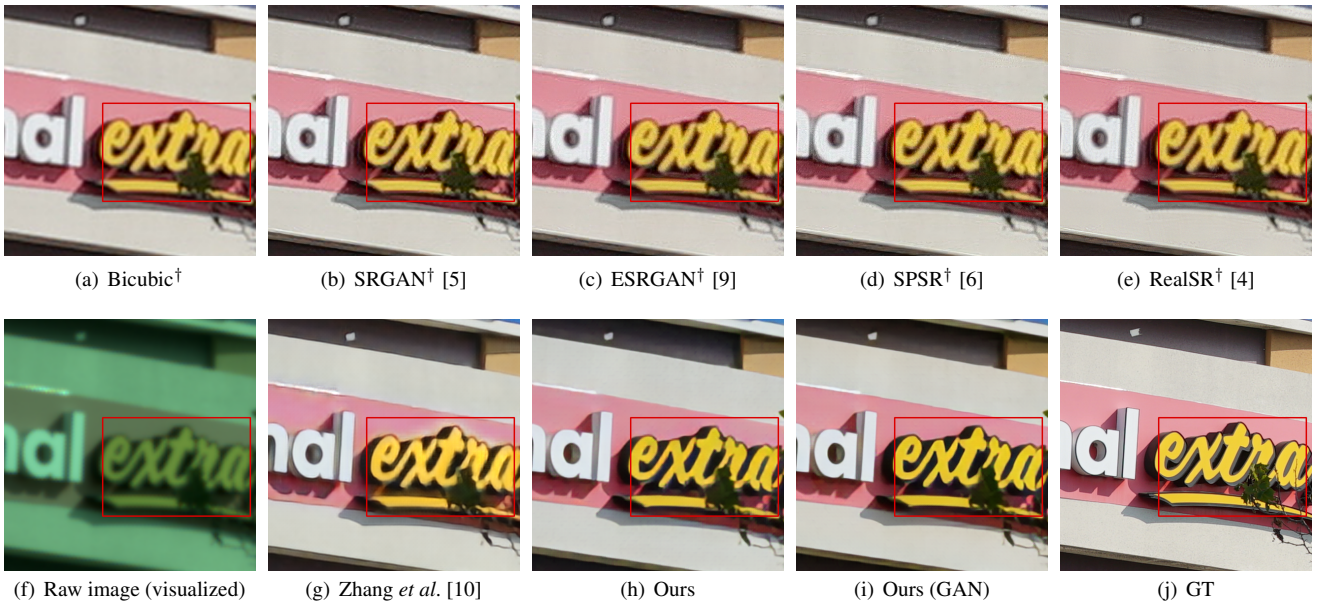

Figure E: Visual comparison on SR-RAW dataset. <sup>†</sup> means that the result is obtained given LR sRGB image as input. The edges of our results are sharper. It can be clearly observed in the red box.

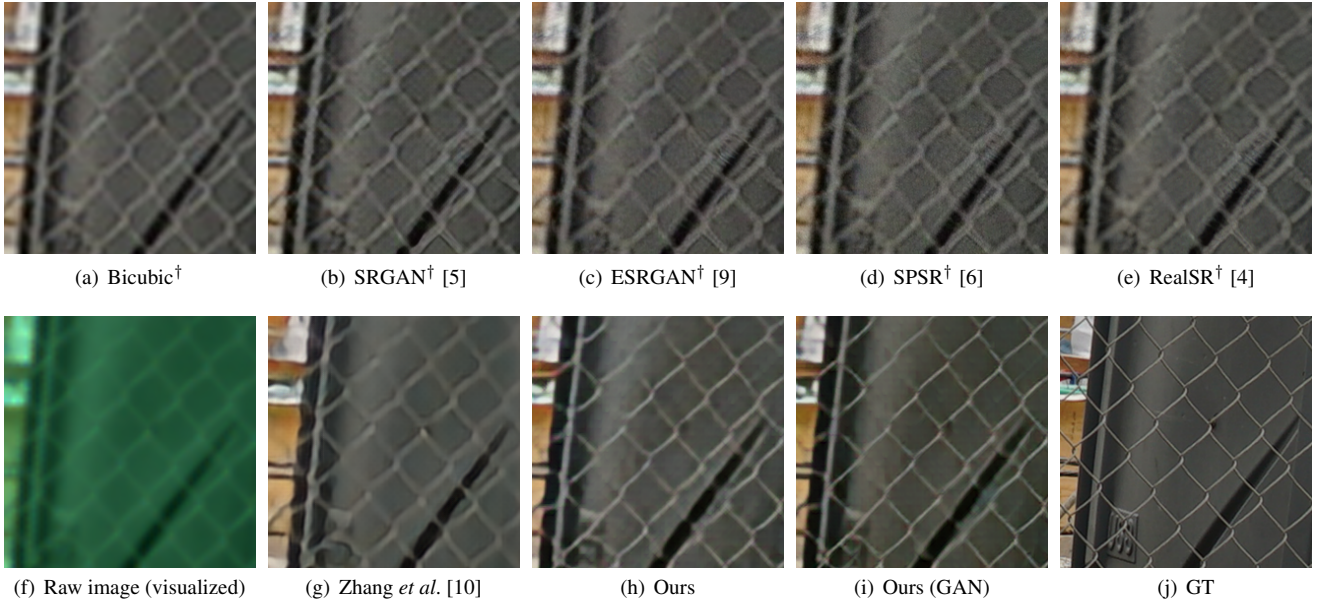

Figure F: Visual comparison on SR-RAW dataset. <sup>†</sup> means that the result is obtained given LR sRGB image as input. The edges of our results are sharper.

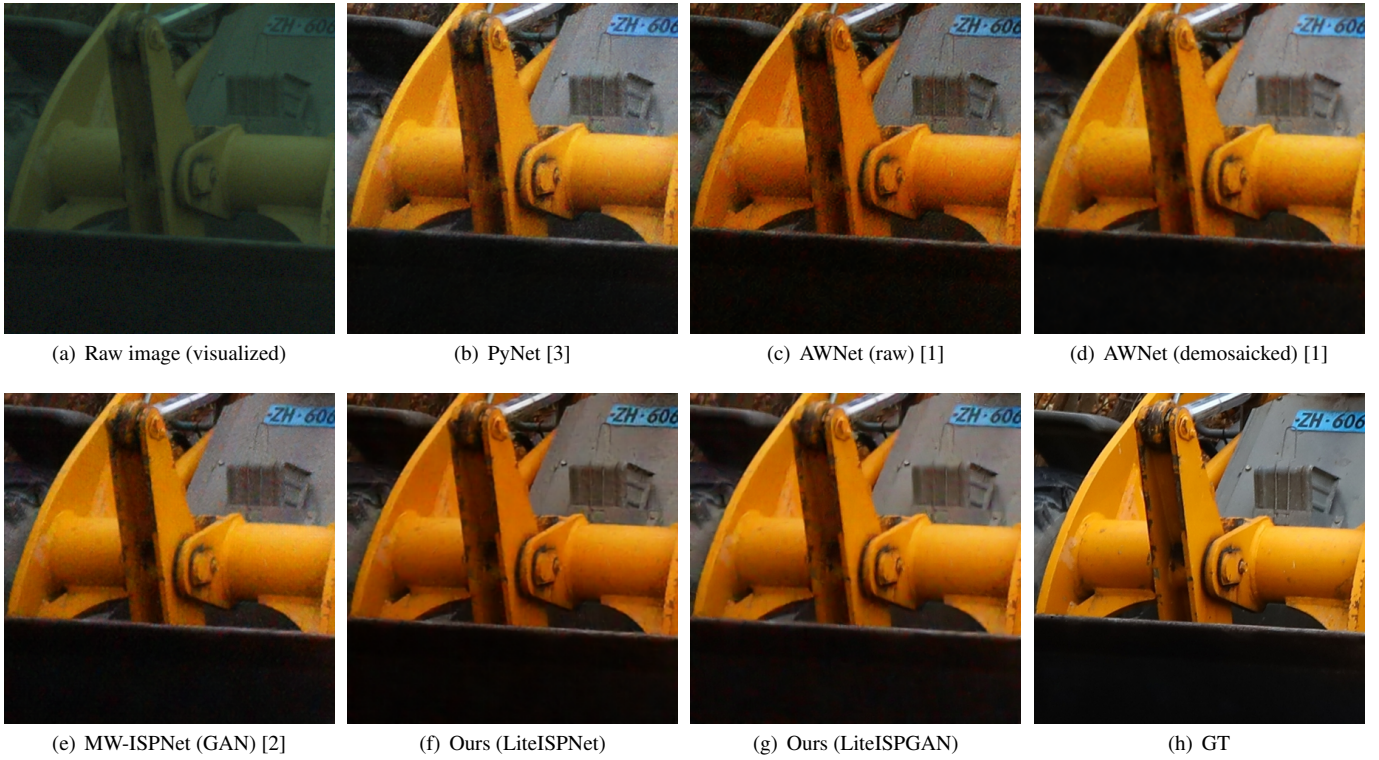

Figure G: Visual comparisons on ZRR dataset. Our results have less noise.



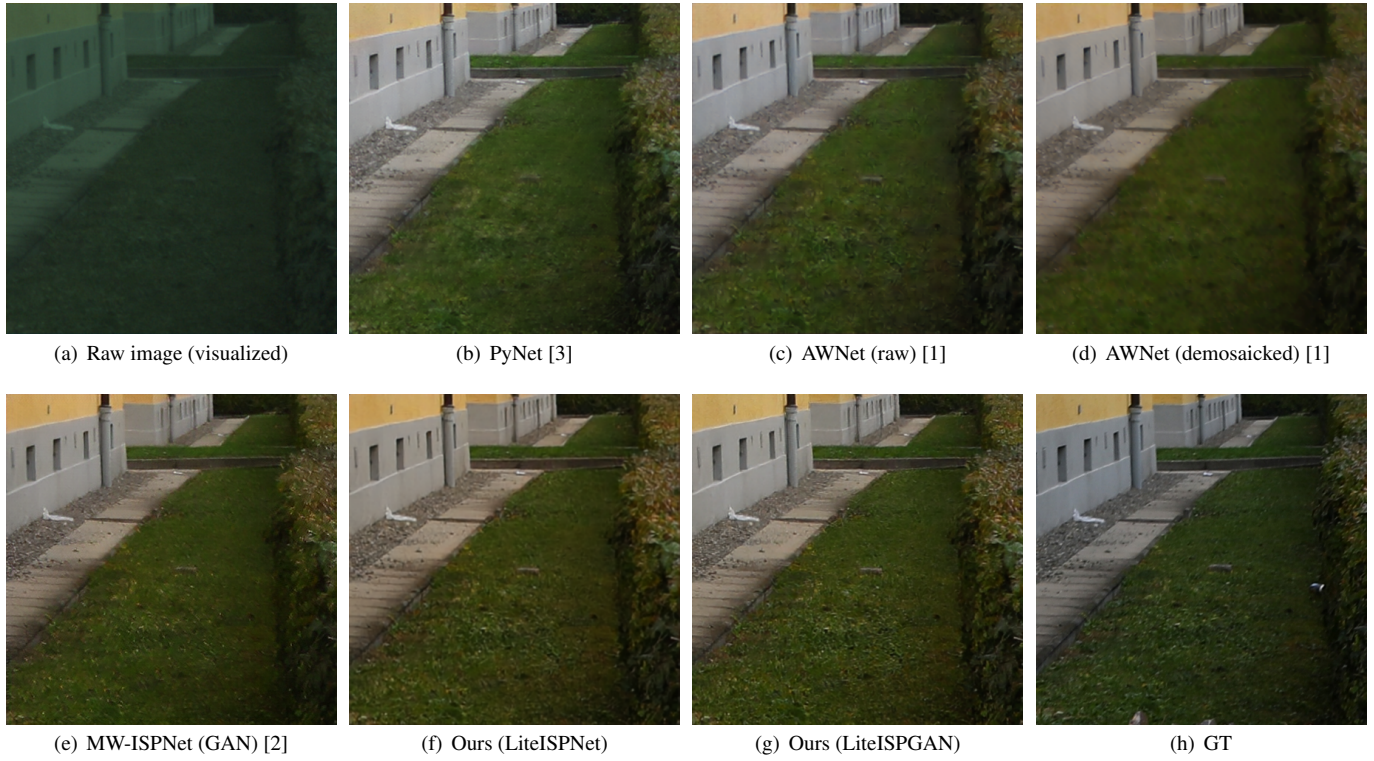

Figure H: Visual comparisons on ZRR dataset. Our results have richer textures on the grass.

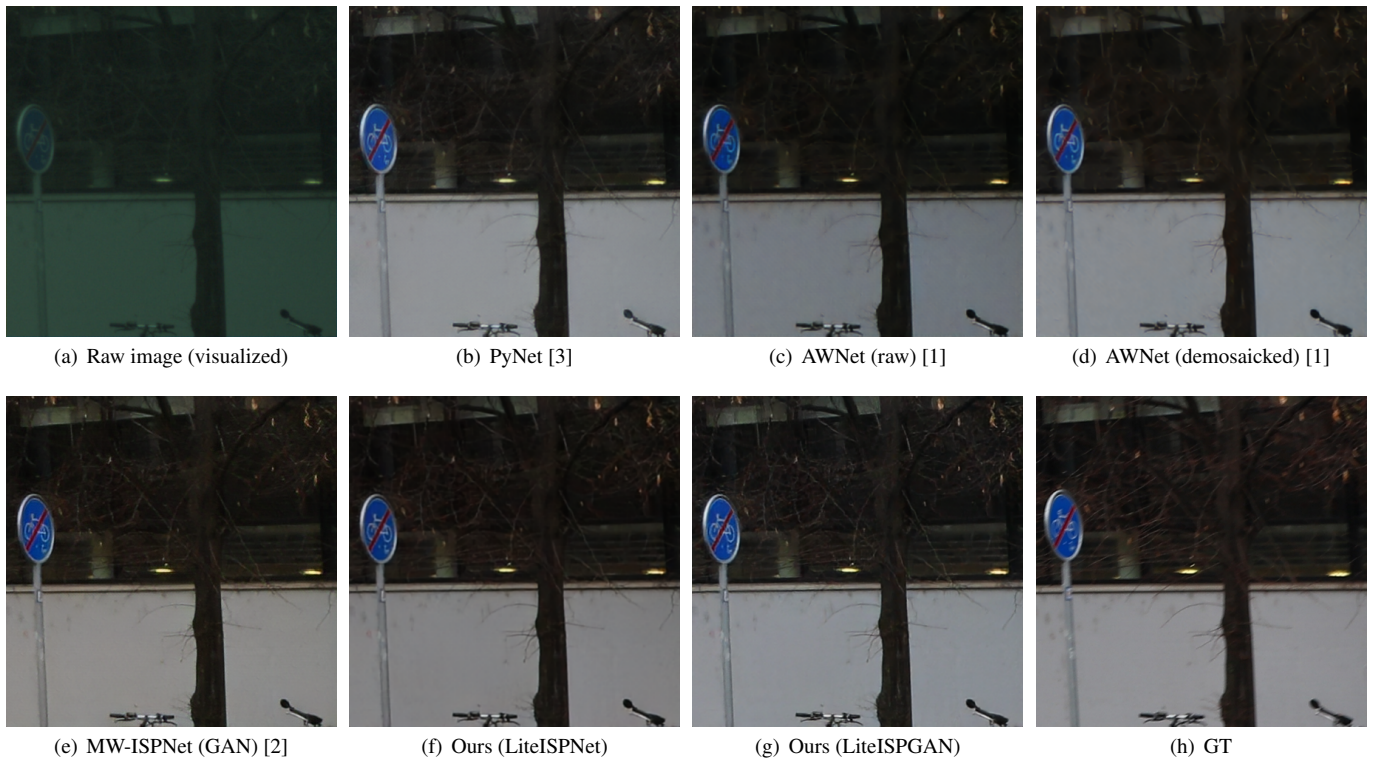

Figure I: Visual comparisons on ZRR dataset. The tree branches in our results are clearer.



## References

- [1] Linhui Dai, Xiaohong Liu, Chengqi Li, and Jun Chen. Awnet: Attentive wavelet network for image isp. In *European Conference on Computer Vision Workshops (ECCVW)*, 2020.
- [2] Andrey Ignatov, Radu Timofte, et al. Aim 2020 challenge on learned image signal processing pipeline. In *European Conference on Computer Vision Workshops (ECCVW)*, 2020.
- [3] Andrey Ignatov, Luc Van Gool, and Radu Timofte. Replacing mobile camera isp with a single deep learning model. In *IEEE Conference on Computer Vision and Pattern Recognition Workshops (CVPRW)*, pages 536–537, 2020.
- [4] Xiaozhong Ji, Yun Cao, Ying Tai, Chengjie Wang, Jilin Li, and Feiyue Huang. Real-world super-resolution via kernel estimation and noise injection. In *IEEE Conference on Computer Vision and Pattern Recognition Workshops (CVPRW)*, pages 466–467, 2020.
- [5] Christian Ledig, Lucas Theis, Ferenc Huszár, Jose Caballero, Andrew Cunningham, Alejandro Acosta, Andrew Aitken, Alykhan Tejani, Johannes Totz, Zehan Wang, et al. Photo-realistic single image super-resolution using a generative adversarial network. In *IEEE Conference on Computer Vision and Pattern Recognition (CVPR)*, pages 4681–4690, 2017.
- [6] Cheng Ma, Yongming Rao, Yean Cheng, Ce Chen, Jiwen Lu, and Jie Zhou. Structure-preserving super resolution with gradient guidance. In *IEEE Conference on Computer Vision and Pattern Recognition (CVPR)*, pages 7769–7778, 2020.
- [7] Olaf Ronneberger, Philipp Fischer, and Thomas Brox. U-net: Convolutional networks for biomedical image segmentation. In *International Conference on Medical Image Computing and Computer Assisted Intervention*, pages 234–241. Springer, 2015.
- [8] Deqing Sun, Xiaodong Yang, Ming-Yu Liu, and Jan Kautz. PWC-net: Cnns for optical flow using pyramid, warping, and cost volume. In *IEEE Conference on Computer Vision and Pattern Recognition (CVPR)*, pages 8934–8943, 2018.
- [9] Xintao Wang, Ke Yu, Shixiang Wu, Jinjin Gu, Yihao Liu, Chao Dong, Yu Qiao, and Chen Change Loy. Esrgan: Enhanced super-resolution generative adversarial networks. In *European Conference on Computer Vision Workshops (ECCVW)*, pages 0–0, 2018.
- [10] Xuaner Zhang, Qifeng Chen, Ren Ng, and Vladlen Koltun. Zoom to learn, learn to zoom. In *IEEE Conference on Computer Vision and Pattern Recognition (CVPR)*, pages 3762–3770, 2019.
- [11] Jun-Yan Zhu, Taesung Park, Phillip Isola, and Alexei A Efros. Unpaired image-to-image translation using cycle-consistent adversarial networks. In *IEEE International Conference on Computer Vision (ICCV)*, pages 2223–2232, 2017.
